# Supplementary material for: Associations between anthropometric outcomes and fat percentage with physical performance in professional soccer players: a cutoff points approach
Source: publisher site journal article supplement (doi:10.1515/teb-2025-0024), 2025-10-07
Supplement: Supplementary file 1 [file j_teb-2025-0024_suppl_001.docx]

The first fat percentage estimation protocol used was Faulkner's for 4 skinfolds: fat percentage = sum of 4 skinfolds x 0.153 + 5.783 [1]. After that, three protocols were used to estimate body density: Pollock protocol for 7 skinfolds: body density = ((1.112 - (0.00043499 x (sum of 7 skinfolds))) + (0.00000055 x (sum of 7 skinfolds) x sum of 7 skinfolds))) - (0.00028826 x (age)))); Jackson and Pollock protocol for 3 skinfolds: body density = ((1.10938 - 0.0008267 x (sum of 3 skinfolds) + 0.0000016 x ((sum of 3 skinfolds) x (sum of 3 skinfolds)) - 0.0002574 x (age))); and Jackson and Pollock protocol for 3 skinfolds: body density = (1.1125025 - 0.0013125 x (sum of 3 skinfolds) x 0.0000055 x ((sum of 3 skinfolds) x (sum of 3 skinfolds)) - 0.000244 x (age)) [2]. Body density values were used to calculate the percentage of fat (fat percentage = ((4.95 / body density) - 4.50) x 100) [3].

1. Faulkner JA. Physiology of swimming and diving. Baltimore: Academic Press; 1968.
2. Jackson AS, Pollock ML. Practical assessment of body composition. Physician Sportsmed. 1985;13(5):76-90. doi:10.1080/00913847.1985.11708790.
3. Siri WE. The gross composition of the body. Adv Biol Med Phys. 1956;4:239-80. doi: 10.1016/b978-1-4832-3110-5.50011-x.

**Table.** Correlations of anthropometric measurements and percentage of fat with the physical performance of 52 professional soccer players.

|  |  | SJ (cm) | | CMJ (cm) | | 30cm DJ (cm) | | 20m sprint (km/h) | | YoYo IRL1 (m) | |
| --- | --- | --- | --- | --- | --- | --- | --- | --- | --- | --- | --- |
| Body mass (kg) | r or rho | 0.024 |  | -0.020 |  | -0.059 |  | -0.126 |  | -0.339 | * |
| p | 0.867 |  | 0.888 |  | 0.676 |  | 0.373 |  | 0.014 |  |
| Upper 95% CI | 0.295 |  | 0.254 |  | 0.217 |  | 0.152 |  | -0.073 |  |
| Lower 95% CI | -0.251 |  | -0.291 |  | -0.327 |  | -0.386 |  | -0.560 |  |
| Triceps (mm) | r or rho | -0.300 | * | -0.365 | ** | -0.347 | * | -0.169 |  | -0.267 |  |
| p | 0.031 |  | 0.008 |  | 0.012 |  | 0.230 |  | 0.055 |  |
| Upper 95% CI | -0.029 |  | -0.102 |  | -0.081 |  | 0.109 |  | 0.006 |  |
| Lower 95% CI | -0.529 |  | -0.580 |  | -0.566 |  | -0.423 |  | -0.504 |  |
| Biceps (mm) | r or rho | -0.225 |  | -0.210 |  | -0.303 | * | -0.260 |  | -0.180 |  |
| p | 0.109 |  | 0.135 |  | 0.029 |  | 0.062 |  | 0.201 |  |
| Upper 95% CI | 0.051 |  | 0.067 |  | -0.033 |  | 0.014 |  | 0.098 |  |
| Lower 95% CI | -0.469 |  | -0.457 |  | -0.532 |  | -0.498 |  | -0.432 |  |
| Chest (mm) | r or rho | -0.038 |  | -0.171 |  | -0.199 |  | -0.137 |  | -0.438 | ** |
| p | 0.792 |  | 0.225 |  | 0.157 |  | 0.334 |  | 0.001 |  |
| Upper 95% CI | 0.238 |  | 0.107 |  | 0.078 |  | 0.141 |  | -0.187 |  |
| Lower 95% CI | -0.307 |  | -0.424 |  | -0.448 |  | -0.395 |  | -0.635 |  |
| Subscapular (mm) | r or rho | -0.104 |  | -0.173 |  | -0.221 |  | -0.190 |  | -0.348 | * |
| p | 0.464 |  | 0.221 |  | 0.116 |  | 0.178 |  | 0.012 |  |
| Upper 95% CI | 0.174 |  | 0.105 |  | 0.056 |  | 0.088 |  | -0.083 |  |
| Lower 95% CI | -0.366 |  | -0.425 |  | -0.465 |  | -0.440 |  | -0.567 |  |
| Middle axillary (mm) | r or rho | -0.118 |  | -0.266 |  | -0.250 |  | -0.187 |  | -0.386 | ** |
| p | 0.405 |  | 0.056 |  | 0.073 |  | 0.185 |  | 0.005 |  |
| Upper 95% CI | 0.160 |  | 0.007 |  | 0.024 |  | 0.091 |  | -0.127 |  |
| Lower 95% CI | -0.379 |  | -0.503 |  | -0.490 |  | -0.437 |  | -0.596 |  |
| Supraspinale (mm) | r or rho | -0.100 |  | -0.213 |  | -0.190 |  | -0.163 |  | -0.362 | ** |
| p | 0.482 |  | 0.130 |  | 0.178 |  | 0.247 |  | 0.008 |  |
| Upper 95% CI | 0.178 |  | 0.064 |  | 0.088 |  | 0.115 |  | -0.098 |  |
| Lower 95% CI | -0.363 |  | -0.459 |  | -0.440 |  | -0.418 |  | -0.577 |  |
| Abdominal (mm) | r or rho | -0.174 |  | -0.218 |  | -0.297 | * | -0.230 |  | -0.579 | *** |
| p | 0.217 |  | 0.120 |  | 0.033 |  | 0.102 |  | <0.001 |  |
| Upper 95% CI | 0.104 |  | 0.058 |  | -0.026 |  | 0.046 |  | -0.364 |  |
| Lower 95% CI | -0.427 |  | -0.463 |  | -0.527 |  | -0.473 |  | -0.736 |  |
| Front thigh (mm) | r or rho | -0.155 |  | -0.262 |  | -0.247 |  | -0.192 |  | -0.352 | * |
| p | 0.273 |  | 0.060 |  | 0.078 |  | 0.174 |  | 0.011 |  |
| Upper 95% CI | 0.123 |  | 0.012 |  | 0.028 |  | 0.086 |  | -0.087 |  |
| Lower 95% CI | -0.411 |  | -0.499 |  | -0.487 |  | -0.441 |  | -0.570 |  |
| Medial calf (mm) | r or rho | -0.096 |  | -0.250 |  | -0.283 | * | -0.016 |  | -0.147 |  |
| p | 0.500 |  | 0.074 |  | 0.042 |  | 0.908 |  | 0.299 |  |
| Upper 95% CI | 0.182 |  | 0.025 |  | -0.011 |  | 0.258 |  | 0.131 |  |
| Lower 95% CI | -0.359 |  | -0.489 |  | -0.516 |  | -0.288 |  | -0.404 |  |
| S9SKF (mm) | r or rho | -0.165 |  | -0.287 | * | -0.290 | * | -0.230 |  | -0.435 | ** |
| p | 0.243 |  | 0.039 |  | 0.037 |  | 0.102 |  | 0.001 |  |
| Upper 95% CI | 0.113 |  | -0.015 |  | -0.018 |  | 0.046 |  | -0.184 |  |
| Lower 95% CI | -0.419 |  | -0.519 |  | -0.522 |  | -0.473 |  | -0.633 |  |
| S4SKF (mm) | r or rho | -0.176 |  | -0.273 |  | -0.265 |  | -0.227 |  | -0.471 | *** |
| p | 0.213 |  | 0.050 |  | 0.058 |  | 0.105 |  | <0.001 |  |
| Upper 95% CI | 0.102 |  | -16.810 |  | 0.008 |  | 0.049 |  | -0.227 |  |
| Lower 95% CI | -0.428 |  | -0.508 |  | -0.502 |  | -0.471 |  | -0.659 |  |
| S7SKF (mm) | r or rho | -0.159 |  | -0.282 | * | -0.280 | * | -0.232 |  | -0.468 | *** |
| p | 0.259 |  | 0.043 |  | 0.045 |  | 0.098 |  | <0.001 |  |
| Upper 95% CI | 0.119 |  | -0.009 |  | -0.007 |  | 0.044 |  | -0.223 |  |
| Lower 95% CI | -0.414 |  | -0.515 |  | -0.513 |  | -0.475 |  | -0.657 |  |
| S3SKFa (mm) | r or rho | -0.125 |  | -0.248 |  | -0.245 |  | -0.209 |  | -0.518 | *** |
| p | 0.377 |  | 0.076 |  | 0.080 |  | 0.137 |  | <0.001 |  |
| Upper 95% CI | 0.153 |  | 0.026 |  | 0.030 |  | 0.068 |  | -0.286 |  |
| Lower 95% CI | -0.385 |  | -0.488 |  | -0.486 |  | -0.456 |  | -0.693 |  |
| S3SKFb (mm) | r or rho | -0.182 |  | -0.275 | * | -0.302 | * | -0.225 |  | -0.419 | ** |
| p | 0.196 |  | 0.048 |  | 0.030 |  | 0.109 |  | 0.002 |  |
| Upper 95% CI | 0.096 |  | -0.002 |  | -0.032 |  | 0.051 |  | -0.165 |  |
| Lower 95% CI | -0.433 |  | -0.510 |  | -0.531 |  | -0.469 |  | -0.621 |  |
| Fat - Faulkner - 4SKF (%) | r or rho | -0.176 |  | -0.273 |  | -0.265 |  | -0.227 |  | -0.471 | *** |
| p | 0.213 |  | 0.050 |  | 0.058 |  | 0.105 |  | <0.001 |  |
| Upper 95% CI | 0.102 |  | -16.810 |  | 0.008 |  | 0.049 |  | -0.227 |  |
| Lower 95% CI | -0.428 |  | -0.508 |  | -0.502 |  | -0.471 |  | -0.659 |  |
| Fat - Pollock - 7SKF (%) | r or rho | -0.237 |  | -0.316 | * | -0.388 | ** | -0.283 | * | -0.475 | *** |
| p | 0.090 |  | 0.022 |  | 0.005 |  | 0.042 |  | <0.001 |  |
| Upper 95% CI | 0.038 |  | -0.048 |  | -0.128 |  | -0.011 |  | -0.233 |  |
| Lower 95% CI | -0.479 |  | -0.542 |  | -0.597 |  | -0.516 |  | -0.662 |  |
| Fat - Jackson and Pollock - 3SKFa (%) | r or rho | -0.205 |  | -0.294 | * | -0.359 | ** | -0.265 |  | -0.534 | *** |
| p | 0.144 |  | 0.035 |  | 0.009 |  | 0.058 |  | <0.001 |  |
| Upper 95% CI | 0.072 |  | -0.023 |  | -0.095 |  | 0.009 |  | -0.305 |  |
| Lower 95% CI | -0.453 |  | -0.525 |  | -0.575 |  | -0.502 |  | -0.704 |  |
| Fat - Jackson and Pollock - 3SKFb (%) | r or rho | -0.272 |  | -0.327 | * | -0.422 | ** | -0.268 |  | -0.401 | ** |
| p | 0.051 |  | 0.018 |  | 0.002 |  | 0.055 |  | 0.003 |  |
| Upper 95% CI | 0.001 |  | -0.059 |  | -0.169 |  | 0.006 |  | -0.144 |  |
| Lower 95% CI | -0.507 |  | -0.550 |  | -0.623 |  | -0.504 |  | -0.607 |  |

Note: * = significant correlation (p < 0.05); confidence interval = CI; S9SKF = sum of nine skinfolds; S4SKF = sum of four skinfolds (triceps, subscapular, supraspinale, and abdominal); S7SKF = sum of seven skinfolds (chest, middle axillary, triceps, subscapular, abdominal, supraspinale, and front thigh); S3SKFa = sum of three skinfolds (chest, abdominal, and front thigh); S3SKFb = sum of three skinfolds (chest, triceps, and subscapular); SJ = squat jump; CMJ = counter movement jump; DJ = drop jump; IRL1 = intermittent recovery level 1.
